# Supplementary material for: Empagliflozin protects against renal ischemia/reperfusion injury in mice
Source: PubMed Central journal article supplement (PMC9652474; doi:10.1038/s41598-022-24103-x), 2022-11-11

The phosphorylation levels of STAT3, STAT-5, ERK1/2 and GSK-3 $\beta$  were normalized to their respective total protein. We first cut the blots prior to hybridization with antibodies according to their molecular weight. Then, we stripped the bands and re-probed the membrane with total protein antibodies at the same molecular weight in the same membrane.

For detecting IL-6, and TNF- $\alpha$ , we cropped the membrane into small strips before hybridization with antibodies according to the protein molecular weight.

We have provided all replicates as follows.

Figure 3B:

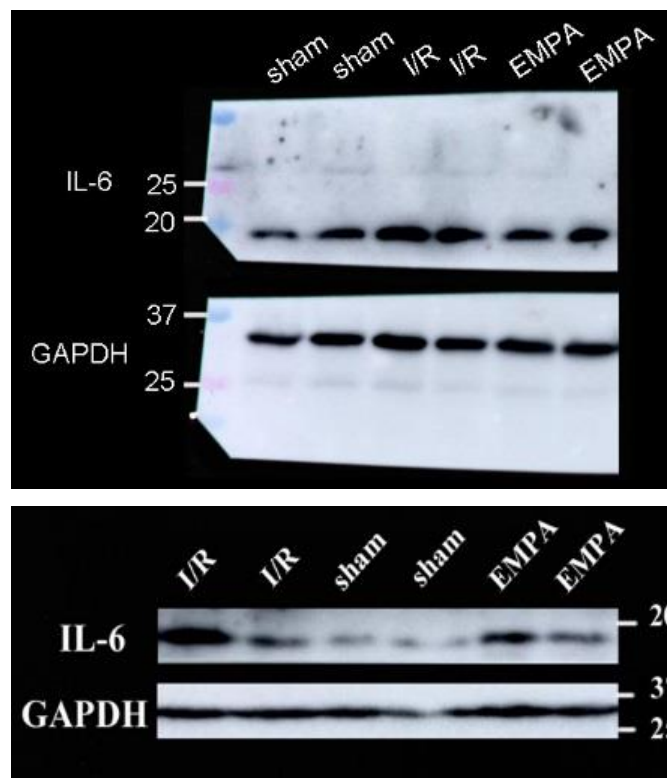

Figure 3D:

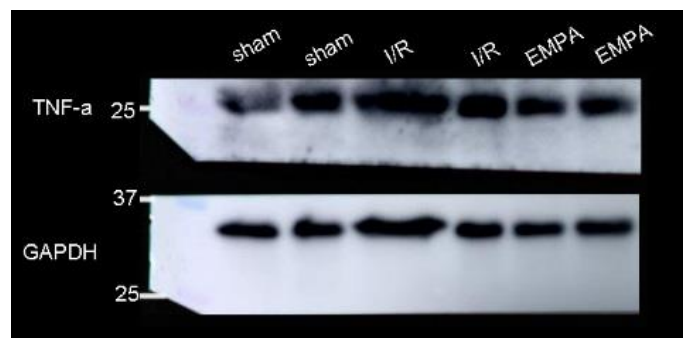

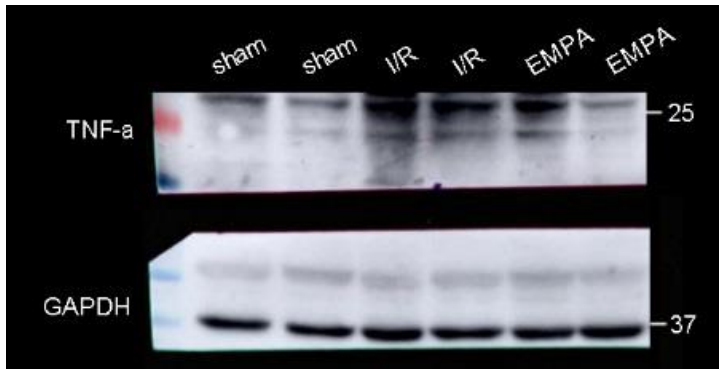

Figure 6A:

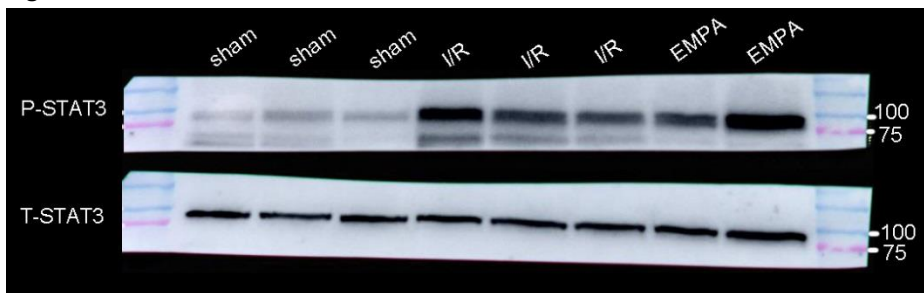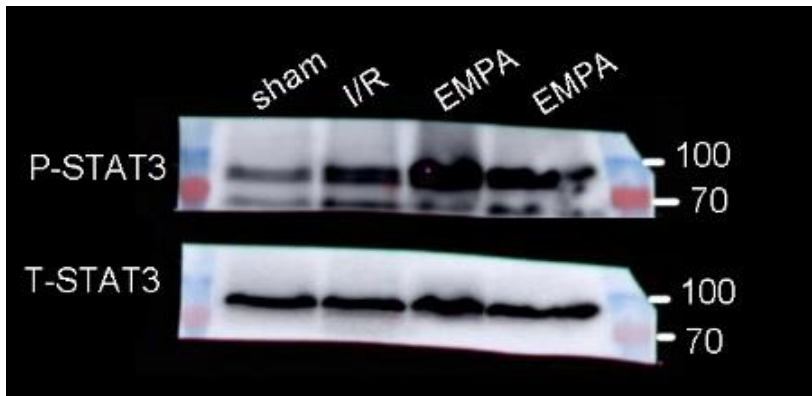

Figure 6B:

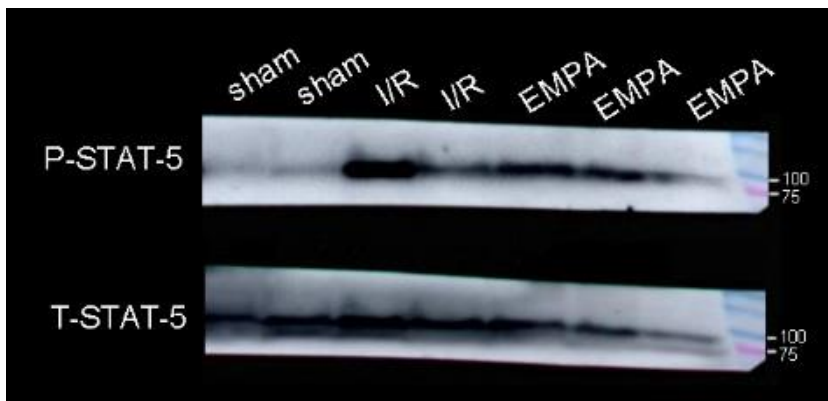

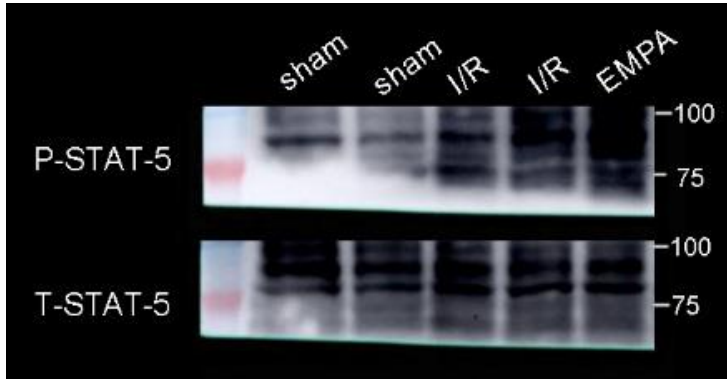

Figure 6C:

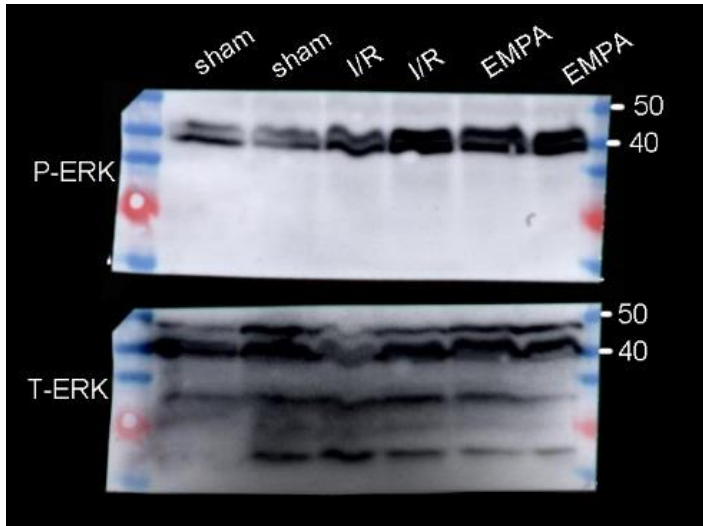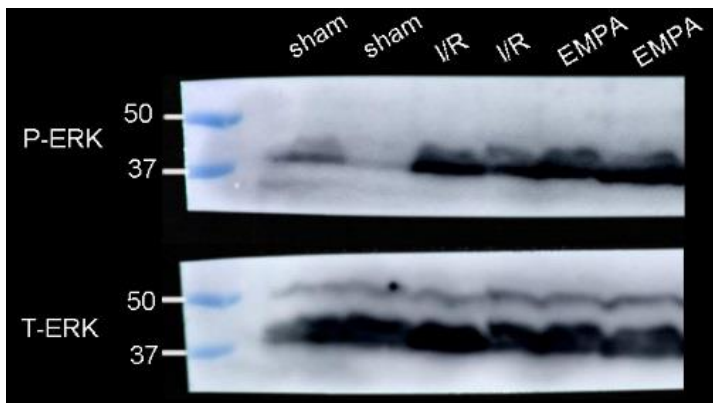

Figure 6D:

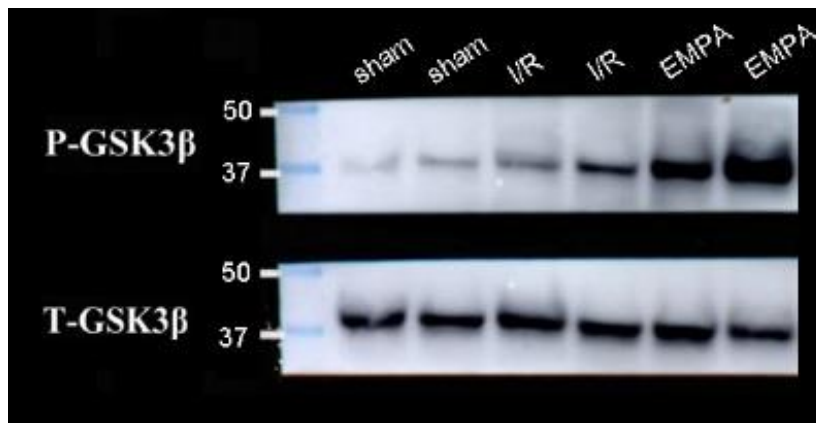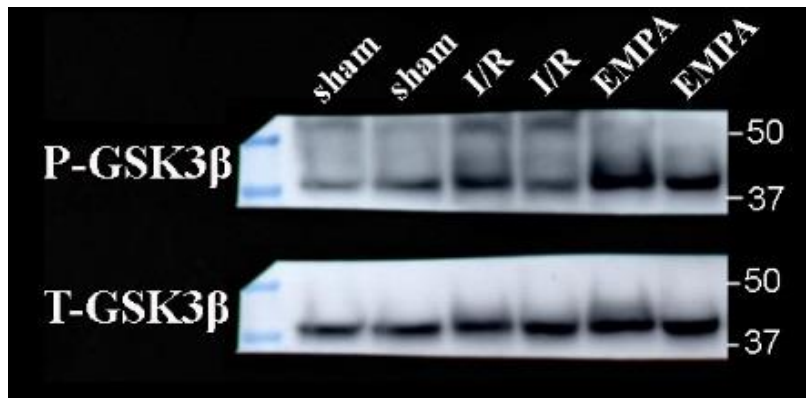

Figure 9:

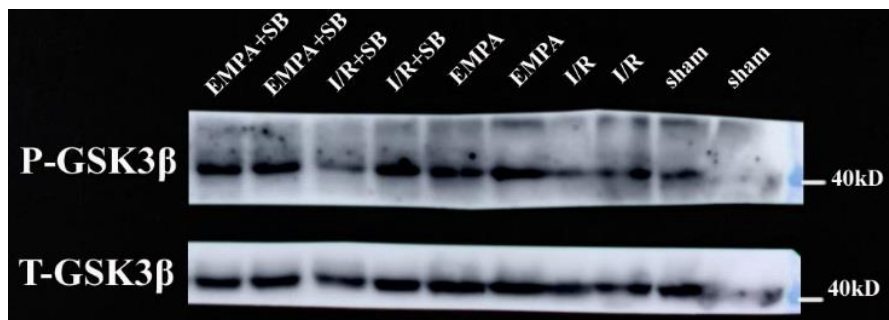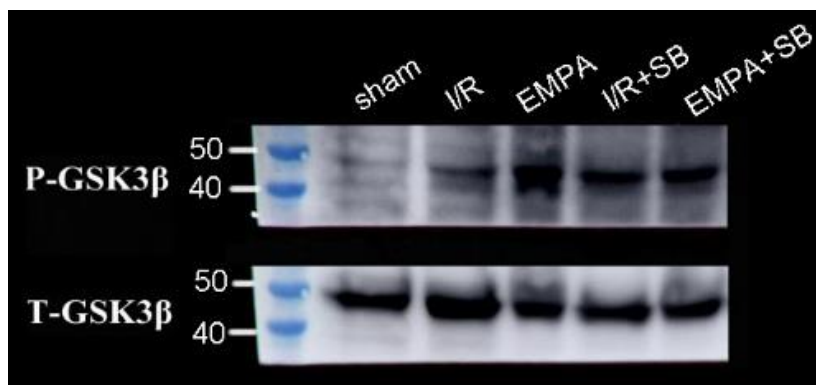

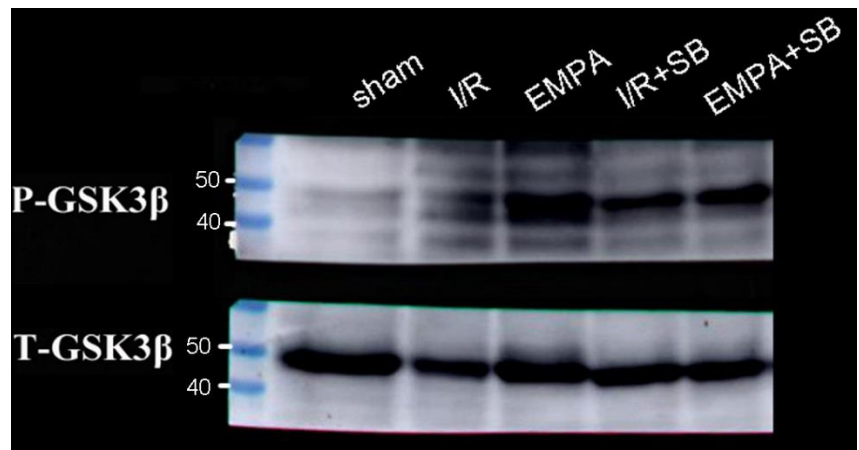

Supplement: 41598_2022_24103_MOESM1_ESM.pdf [file 41598_2022_24103_MOESM1_ESM.pdf]
